# Supplementary material for: Role of microporous Janus silica nanosheets in the assembly of ultra-small Ag nanoparticles with high catalytic activity
Source: Royal Society of Chemistry journal article supplement (doi:10.1039/d0dt03702h), 2020-11-20
Supplement: d0dt03702h1.pdf [file d0dt03702h1.pdf]

## Supplementary Information

### **Role of microporous Janus silica nanosheets in assembly of ultra-small Ag nanoparticles with high catalytic activity**

Mengnan Yang, Zhaoli Yan\*, Tiantian Li, Bing Liu, Qiangshan Jing\*, Peng Liu

*Henan Province Key Laboratory of Utilization of Non-metallic Mineral in the South of Henan,  
College of Chemistry and Chemical Engineering, Xinyang Normal University, Xinyang 464000,  
China*

#### **AUTHOR INFORMATION**

##### **Corresponding Author**

\* Email: zhaoliyan@xynu.edu.cn (Z. Yan), 9jqshan@163.com (Q. Jing); Tel/Fax: +86-376-6390603

**Table S1** The main chemical composition of kaolinite and SiNSs samples.

| Samples   | Main composition (wt.%) |       |       |      |      |      |      |      |      |      |      |
|-----------|-------------------------|-------|-------|------|------|------|------|------|------|------|------|
|           | O                       | Si    | Al    | Fe   | Ti   | K    | Ca   | Na   | Mg   | P    | S    |
| Kaolinite | 49.66                   | 25.92 | 21.71 | 0.43 | 0.26 | 0.61 | 0.09 | 0.05 | 0.11 | 0.12 | 0.70 |
| SiNSs     | 52.96                   | 45.64 | 0.66  | 0.07 | 0.43 | 0.06 | 0.01 | 0.02 | 0.04 | 0.01 | 0.01 |

**Table S2** Textural properties of kaolinite and SiNSs-1 samples.

| Samples              | $S_{\text{BET}}$ (m <sup>2</sup> /g) | $S_{\text{micro}}^{\text{b}}$ (m <sup>2</sup> /g) | $V_{\text{tot}}$ (cm <sup>3</sup> /g) | $V_{\text{micro}}^{\text{b}}$ (cm <sup>3</sup> /g) | Average pore diameter (nm) |
|----------------------|--------------------------------------|---------------------------------------------------|---------------------------------------|----------------------------------------------------|----------------------------|
| Kaolinite            | 23                                   | 0                                                 | 0.22                                  | 0                                                  | 38.03                      |
| SiNSs-1 <sup>a</sup> | 312                                  | 214                                               | 0.33                                  | 0.09                                               | 4.22                       |

<sup>a</sup> The silica nanosheets (SiNSs-1) were prepared according to our previous work.

<sup>b</sup> The micropore surface areas ( $S_{\text{micro}}$ ) and volumes ( $V_{\text{micro}}$ ) were estimated by the t-plot method.

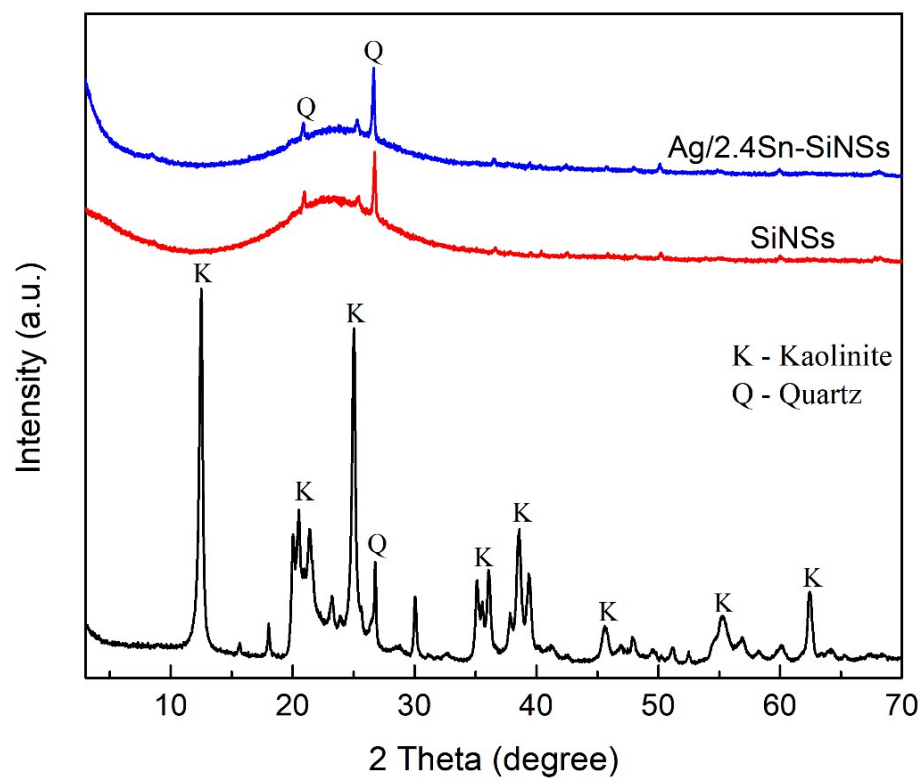

**Fig. S1** XRD patterns of kaolinite, SiNSs and Ag/2.4Sn-SiNSs samples.

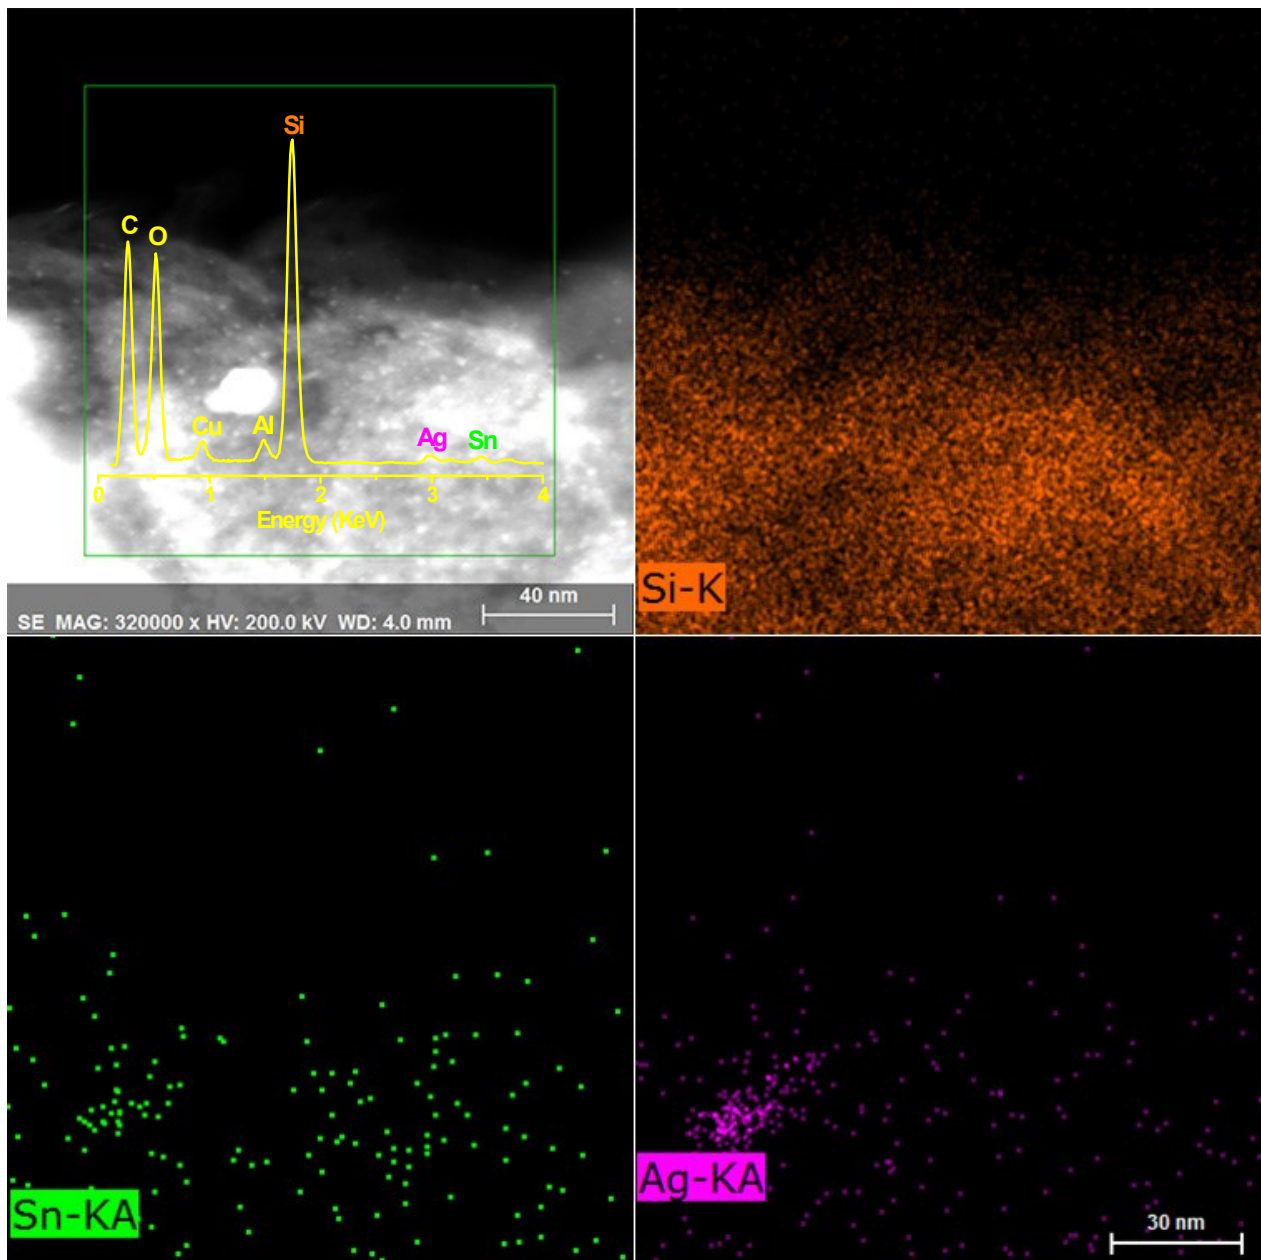

**Fig. S2** STEM image (inserted EDS spectrum) and the corresponding quantitative EDS maps for Si, Sn and Ag elements of Ag/2.4Sn-SiNSs sample.

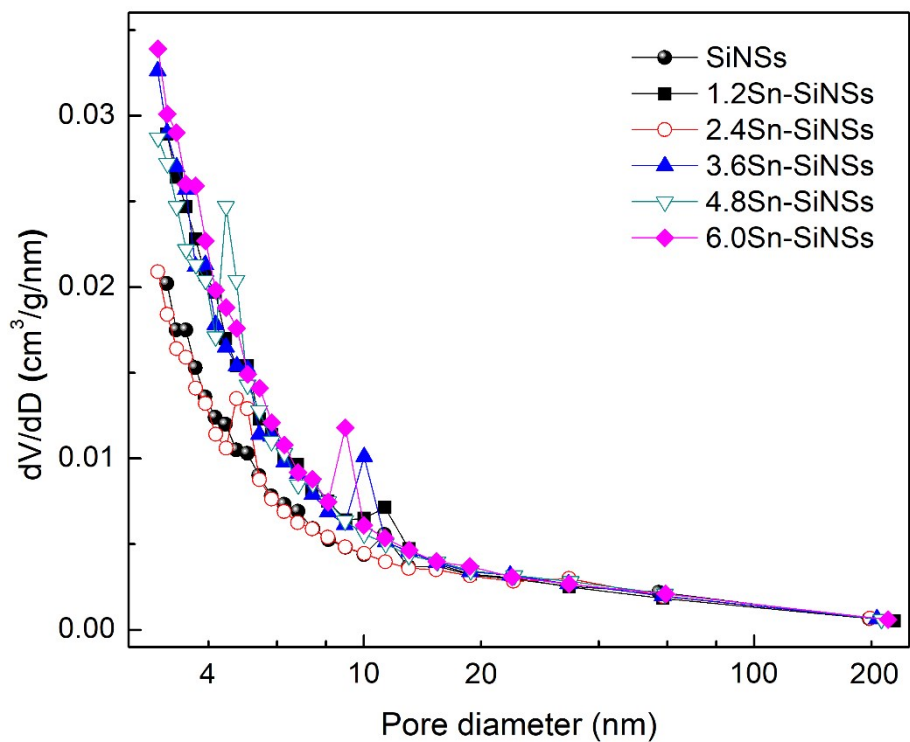

**Fig. S3** BJH pore size distribution curves of SiNSs and  $x\text{Sn-SiNSs}$  samples.
